# Supplementary figures and images for: Hip fracture risk with corticosteroids in patients with COPD: a systematic review and meta-analysis
Source: Research Square preprint supplement (doi:10.21203/rs.3.rs-238943/v1), 2021-03-17

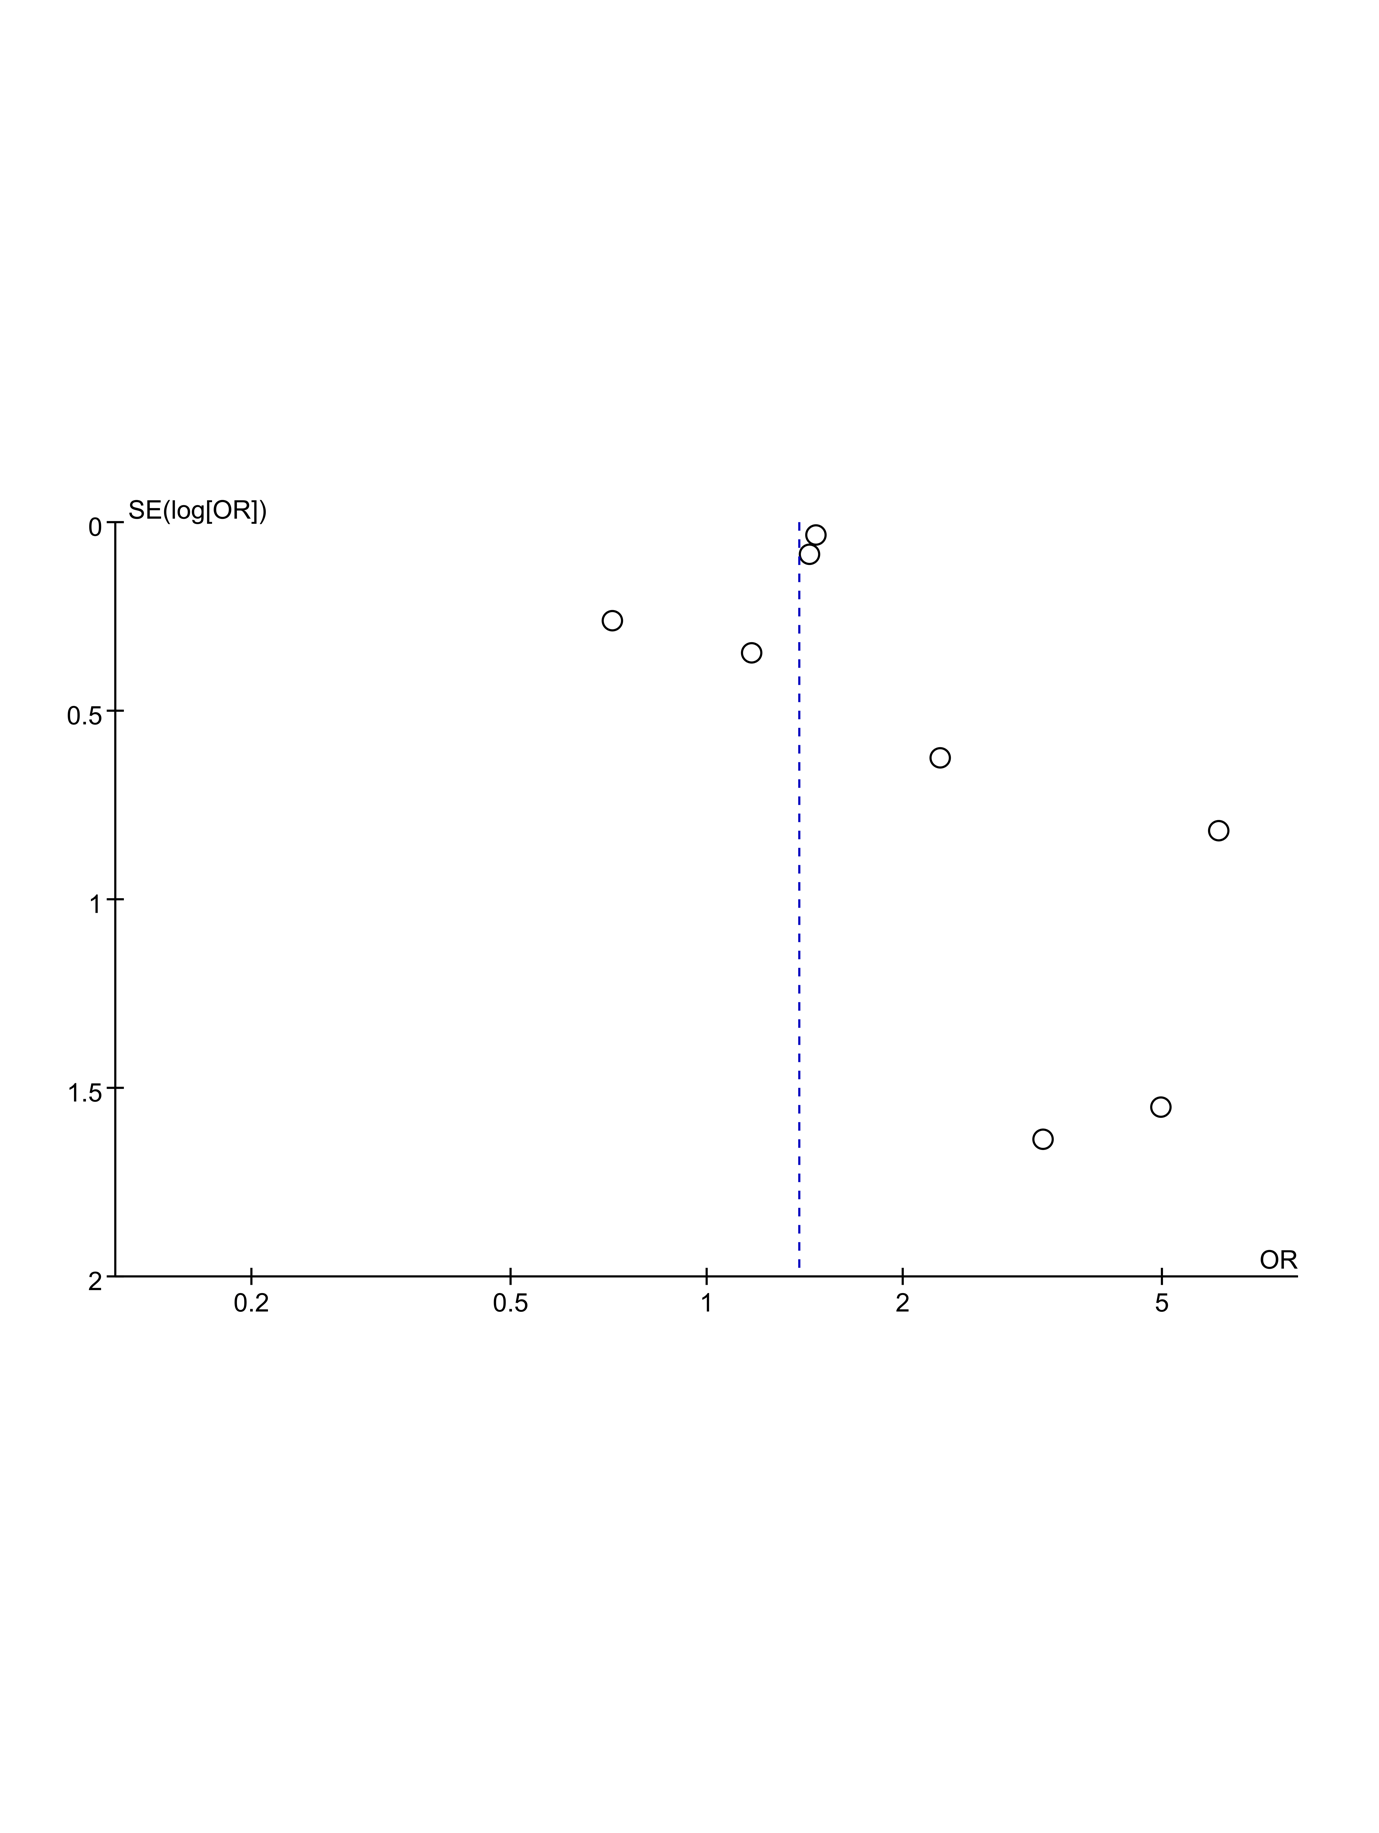


Supplemental figure 1: Publication bias was assessed by funnel plot.

Supplement: Supplementary file 1 [file 1db627bb20a4d03a43dc9670.docx]
